## CORRECTION

# Correction: Offsetting unabated agricultural emissions with CO<sub>2</sub> removal to achieve ambitious climate targets

Nicoletta Brazzola, Jan Wohland, Anthony Patt

In [Fig 5](#), panel c, the grey bars show incorrect values. The authors have provided a corrected version here.

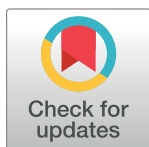

## OPEN ACCESS

**Citation:** Brazzola N, Wohland J, Patt A (2021) Correction: Offsetting unabated agricultural emissions with CO<sub>2</sub> removal to achieve ambitious climate targets. PLoS ONE 16(10): e0259548. <https://doi.org/10.1371/journal.pone.0259548>

**Published:** October 28, 2021

**Copyright:** © 2021 Brazzola et al. This is an open access article distributed under the terms of the [Creative Commons Attribution License](#), which permits unrestricted use, distribution, and reproduction in any medium, provided the original author and source are credited.

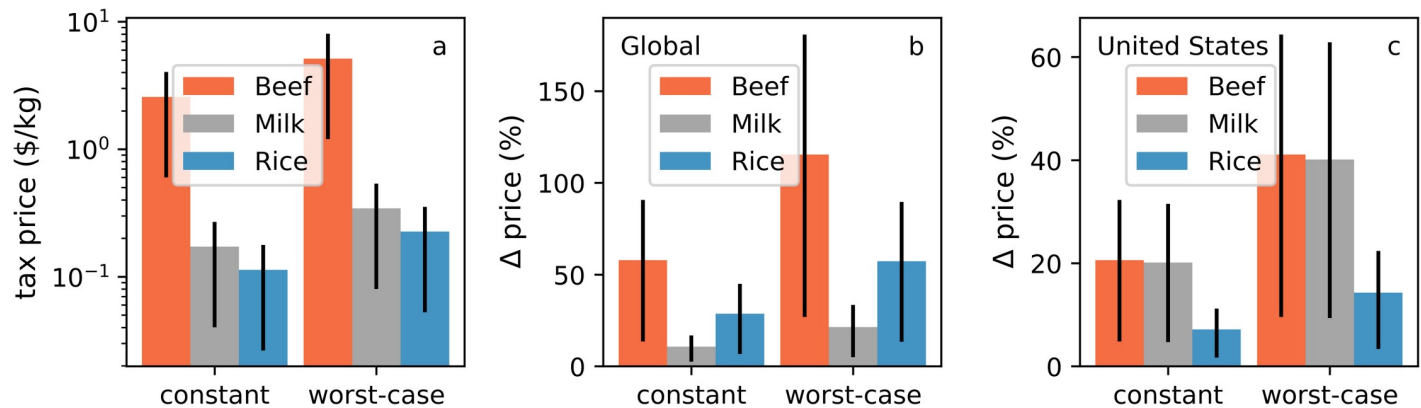

**Fig 5. Tax-driven increase in price of agricultural commodities.** a) Mean absolute price increase of agricultural products (beef, milk, and rice) due to the introduction of a tax on non-CO<sub>2</sub> agricultural emissions. b) Relative price increase compared to their current average retail price globally. c) Relative price increase compared to their current average retail price in the United States. Error bars denote the price uncertainty stemming from CDR cost uncertainty in the range of \$35-235/tCO<sub>2</sub> removed.

<https://doi.org/10.1371/journal.pone.0259548.g001>

## Reference

1. Brazzola N, Wohland J, Patt A (2021) Offsetting unabated agricultural emissions with CO<sub>2</sub> removal to achieve ambitious climate targets. PLoS ONE 16(3): e0247887. <https://doi.org/10.1371/journal.pone.0247887> PMID: 33730045
